# Supplementary material for: Effects of Supplementation of Diet with <i>Olea europaea </i>L. Polyphenols on the Animal Welfare and Milk Quality in Italian Holstein-Friesian Dairy Cows
Source: Preprints.org preprint supplement (doi:10.20944/preprints202309.0232.v1), 2023-09-06
Supplement: Supplementary file 4 [file supplementary]

**Supplementary Materials**

Effects of supplementation of diet with *Olea europaea* L. polyphenols on the animal welfare and milk quality in Italian Holstein-Friesian dairy cows

Maria Chiara Di Meo 1, Antonia Giacco 1, Armando Zarrelli 2, Vittorio Maria Mandrone 1, Livia D’Angelo 3, Elena Silvestri 1, Paolo De Girolamo 3 and Ettore Varricchio1*

| **Table S1.** Summary results Two-way Anova (Tukey test) of milk fatty acids | | | | | |
| --- | --- | --- | --- | --- | --- |
|  |  |  |  |  |  |
| **Summary results Two-way ANOVA** | | | | | |
|  |
| **Tukey's multiple comparisons test** | | | | | |  |
| **C 14:0** |  |  |  |  |  |  |
| P | Statistical Significance | S | Statistical Significance | PL | Statistical Significance |  |
| T0 vs. T1 | ns | T0 vs. T1 | *** | T0 vs. T1 | *** |  |
| T0 vs. T2 | ns | T0 vs. T2 | *** | T0 vs. T2 | *** |  |
| T0 vs. T3 | ns | T0 vs. T3 | *** | T0 vs. T3 | *** |  |
| T0 vs. T4 | * | T0 vs. T4 | *** | T0 vs. T4 | *** |  |
| T0 vs. T5 | ** | T0 vs. T5 | *** | T0 vs. T5 | *** |  |
| T1 vs. T2 | ns | T1 vs. T2 | *** | T1 vs. T2 | ns |  |
| T1 vs. T3 | ns | T1 vs. T3 | *** | T1 vs. T3 | *** |  |
| T1 vs. T4 | ns | T1 vs. T4 | *** | T1 vs. T4 | *** |  |
| T1 vs. T5 | * | T1 vs. T5 | *** | T1 vs. T5 | *** |  |
| T2 vs. T3 | ns | T2 vs. T3 | *** | T2 vs. T3 | *** |  |
| T2 vs. T4 | ns | T2 vs. T4 | *** | T2 vs. T4 | *** |  |
| T2 vs. T5 | ns | T2 vs. T5 | *** | T2 vs. T5 | *** |  |
| T3 vs. T4 | ns | T3 vs. T4 | *** | T3 vs. T4 | *** |  |
| T3 vs. T5 | ns | T3 vs. T5 | *** | T3 vs. T5 | *** |  |
| T4 vs. T5 | ns | T4 vs. T5 | ** | T4 vs. T5 | *** |  |
|  |  |  |  |  |  |  |
| **C 16:0** |  |  |  |  |  |  |
| P | Statistical Significance | S | Statistical Significance | PL | Statistical Significance |  |
| T0 vs. T1 | ns | T0 vs. T1 | *** | T0 vs. T1 | *** |  |
| T0 vs. T2 | ns | T0 vs. T2 | *** | T0 vs. T2 | *** |  |
| T0 vs. T3 | *** | T0 vs. T3 | *** | T0 vs. T3 | *** |  |
| T0 vs. T4 | *** | T0 vs. T4 | *** | T0 vs. T4 | *** |  |
| T0 vs. T5 | *** | T0 vs. T5 | *** | T0 vs. T5 | *** |  |
| T1 vs. T2 | ns | T1 vs. T2 | *** | T1 vs. T2 | ns |  |
| T1 vs. T3 | *** | T1 vs. T3 | *** | T1 vs. T3 | *** |  |
| T1 vs. T4 | *** | T1 vs. T4 | *** | T1 vs. T4 | *** |  |
| T1 vs. T5 | *** | T1 vs. T5 | *** | T1 vs. T5 | *** |  |
| T2 vs. T3 | *** | T2 vs. T3 | *** | T2 vs. T3 | *** |  |
| T2 vs. T4 | *** | T2 vs. T4 | *** | T2 vs. T4 | *** |  |
| T2 vs. T5 | *** | T2 vs. T5 | *** | T2 vs. T5 | *** |  |
| T3 vs. T4 | *** | T3 vs. T4 | ns | T3 vs. T4 | *** |  |
| T3 vs. T5 | *** | T3 vs. T5 | * | T3 vs. T5 | *** |  |
| T4 vs. T5 | * | T4 vs. T5 | ns | T4 vs. T5 | ns |  |
|  |  |  |  |  |  |  |
| **C 16:1 n7t** |  |  |  |  |  |  |
| P | Statistical Significance | S | Statistical Significance | PL | Statistical Significance |  |
| T0 vs. T1 | *** | T0 vs. T1 | ns | T0 vs. T1 | ns |  |
| T0 vs. T2 | *** | T0 vs. T2 | ** | T0 vs. T2 | ns |  |
| T0 vs. T3 | *** | T0 vs. T3 | *** | T0 vs. T3 | *** |  |
| T0 vs. T4 | *** | T0 vs. T4 | *** | T0 vs. T4 | *** |  |
| T0 vs. T5 | *** | T0 vs. T5 | *** | T0 vs. T5 | *** |  |
| T1 vs. T2 | *** | T1 vs. T2 | ns | T1 vs. T2 | ns |  |
| T1 vs. T3 | *** | T1 vs. T3 | *** | T1 vs. T3 | *** |  |
| T1 vs. T4 | *** | T1 vs. T4 | *** | T1 vs. T4 | *** |  |
| T1 vs. T5 | *** | T1 vs. T5 | *** | T1 vs. T5 | *** |  |
| T2 vs. T3 | *** | T2 vs. T3 | *** | T2 vs. T3 | ** |  |
| T2 vs. T4 | *** | T2 vs. T4 | *** | T2 vs. T4 | *** |  |
| T2 vs. T5 | *** | T2 vs. T5 | *** | T2 vs. T5 | *** |  |
| T3 vs. T4 | ** | T3 vs. T4 | *** | T3 vs. T4 | ns |  |
| T3 vs. T5 | *** | T3 vs. T5 | *** | T3 vs. T5 | *** |  |
| T4 vs. T5 | *** | T4 vs. T5 | ns | T4 vs. T5 | ns |  |
|  |  |  |  |  |  |  |
| **C 16:1 n7** |  |  |  |  |  |  |
| P | Statistical Significance | S | Statistical Significance | PL | Statistical Significance |  |
| T0 vs. T1 | ns | T0 vs. T1 | * | T0 vs. T1 | ns |  |
| T0 vs. T2 | * | T0 vs. T2 | *** | T0 vs. T2 | ns |  |
| T0 vs. T3 | ** | T0 vs. T3 | *** | T0 vs. T3 | *** |  |
| T0 vs. T4 | *** | T0 vs. T4 | *** | T0 vs. T4 | *** |  |
| T0 vs. T5 | *** | T0 vs. T5 | *** | T0 vs. T5 | *** |  |
| T1 vs. T2 | ns | T1 vs. T2 | *** | T1 vs. T2 | ns |  |
| T1 vs. T3 | ns | T1 vs. T3 | *** | T1 vs. T3 | *** |  |
| T1 vs. T4 | ns | T1 vs. T4 | *** | T1 vs. T4 | *** |  |
| T1 vs. T5 | * | T1 vs. T5 | *** | T1 vs. T5 | *** |  |
| T2 vs. T3 | ns | T2 vs. T3 | *** | T2 vs. T3 | * |  |
| T2 vs. T4 | ns | T2 vs. T4 | *** | T2 vs. T4 | *** |  |
| T2 vs. T5 | ns | T2 vs. T5 | *** | T2 vs. T5 | *** |  |
| T3 vs. T4 | ns | T3 vs. T4 | *** | T3 vs. T4 | ** |  |
| T3 vs. T5 | ns | T3 vs. T5 | *** | T3 vs. T5 | *** |  |
| T4 vs. T5 | ns | T4 vs. T5 | *** | T4 vs. T5 | ** |  |
|  |  |  |  |  |  |  |
| **C 18:0** |  |  |  |  |  |  |
| P | Statistical Significance | S | Statistical Significance | PL | Statistical Significance |  |
| T0 vs. T1 | *** | T0 vs. T1 | *** | T0 vs. T1 | *** |  |
| T0 vs. T2 | *** | T0 vs. T2 | *** | T0 vs. T2 | *** |  |
| T0 vs. T3 | *** | T0 vs. T3 | *** | T0 vs. T3 | *** |  |
| T0 vs. T4 | *** | T0 vs. T4 | *** | T0 vs. T4 | *** |  |
| T0 vs. T5 | *** | T0 vs. T5 | *** | T0 vs. T5 | *** |  |
| T1 vs. T2 | ns | T1 vs. T2 | *** | T1 vs. T2 | ** |  |
| T1 vs. T3 | *** | T1 vs. T3 | *** | T1 vs. T3 | *** |  |
| T1 vs. T4 | *** | T1 vs. T4 | *** | T1 vs. T4 | *** |  |
| T1 vs. T5 | *** | T1 vs. T5 | *** | T1 vs. T5 | *** |  |
| T2 vs. T3 | *** | T2 vs. T3 | *** | T2 vs. T3 | *** |  |
| T2 vs. T4 | *** | T2 vs. T4 | *** | T2 vs. T4 | *** |  |
| T2 vs. T5 | *** | T2 vs. T5 | *** | T2 vs. T5 | *** |  |
| T3 vs. T4 | *** | T3 vs. T4 | *** | T3 vs. T4 | *** |  |
| T3 vs. T5 | *** | T3 vs. T5 | *** | T3 vs. T5 | *** |  |
| T4 vs. T5 | *** | T4 vs. T5 | *** | T4 vs. T5 | *** |  |
|  |  |  |  |  |  |  |
| **C 18:1 n9** |  |  |  |  |  |  |
| P | Statistical Significance | S | Statistical Significance | PL | Statistical Significance |  |
| T0 vs. T1 | ns | T0 vs. T1 | *** | T0 vs. T1 | *** |  |
| T0 vs. T2 | ns | T0 vs. T2 | *** | T0 vs. T2 | *** |  |
| T0 vs. T3 | *** | T0 vs. T3 | *** | T0 vs. T3 | *** |  |
| T0 vs. T4 | *** | T0 vs. T4 | *** | T0 vs. T4 | *** |  |
| T0 vs. T5 | *** | T0 vs. T5 | *** | T0 vs. T5 | *** |  |
| T1 vs. T2 | ns | T1 vs. T2 | *** | T1 vs. T2 | ** |  |
| T1 vs. T3 | *** | T1 vs. T3 | *** | T1 vs. T3 | *** |  |
| T1 vs. T4 | *** | T1 vs. T4 | *** | T1 vs. T4 | *** |  |
| T1 vs. T5 | *** | T1 vs. T5 | *** | T1 vs. T5 | *** |  |
| T2 vs. T3 | *** | T2 vs. T3 | *** | T2 vs. T3 | *** |  |
| T2 vs. T4 | *** | T2 vs. T4 | *** | T2 vs. T4 | *** |  |
| T2 vs. T5 | *** | T2 vs. T5 | *** | T2 vs. T5 | *** |  |
| T3 vs. T4 | ** | T3 vs. T4 | *** | T3 vs. T4 | *** |  |
| T3 vs. T5 | *** | T3 vs. T5 | *** | T3 vs. T5 | *** |  |
| T4 vs. T5 | ns | T4 vs. T5 | ns | T4 vs. T5 | *** |  |
|  |  |  |  |  |  |  |
| **C 18:2 n6** |  |  |  |  |  |  |
| P | Statistical Significance | S | Statistical Significance | PL | Statistical Significance |  |
| T0 vs. T1 | ns | T0 vs. T1 | *** | T0 vs. T1 | *** |  |
| T0 vs. T2 | ns | T0 vs. T2 | *** | T0 vs. T2 | *** |  |
| T0 vs. T3 | ** | T0 vs. T3 | *** | T0 vs. T3 | *** |  |
| T0 vs. T4 | *** | T0 vs. T4 | *** | T0 vs. T4 | *** |  |
| T0 vs. T5 | *** | T0 vs. T5 | *** | T0 vs. T5 | *** |  |
| T1 vs. T2 | ns | T1 vs. T2 | ns | T1 vs. T2 | ns |  |
| T1 vs. T3 | ns | T1 vs. T3 | *** | T1 vs. T3 | *** |  |
| T1 vs. T4 | *** | T1 vs. T4 | *** | T1 vs. T4 | *** |  |
| T1 vs. T5 | *** | T1 vs. T5 | *** | T1 vs. T5 | *** |  |
| T2 vs. T3 | ns | T2 vs. T3 | *** | T2 vs. T3 | *** |  |
| T2 vs. T4 | *** | T2 vs. T4 | *** | T2 vs. T4 | *** |  |
| T2 vs. T5 | *** | T2 vs. T5 | *** | T2 vs. T5 | *** |  |
| T3 vs. T4 | *** | T3 vs. T4 | *** | T3 vs. T4 | ** |  |
| T3 vs. T5 | *** | T3 vs. T5 | *** | T3 vs. T5 | *** |  |
| T4 vs. T5 | ns | T4 vs. T5 | *** | T4 vs. T5 | *** |  |
|  |  |  |  |  |  |  |
| **C 18:3 n6** |  |  |  |  |  |  |
| P | Statistical Significance | S | Statistical Significance | PL | Statistical Significance |  |
| T0 vs. T1 | ns | T0 vs. T1 | *** | T0 vs. T1 | *** |  |
| T0 vs. T2 | ns | T0 vs. T2 | *** | T0 vs. T2 | *** |  |
| T0 vs. T3 | ns | T0 vs. T3 | *** | T0 vs. T3 | *** |  |
| T0 vs. T4 | ns | T0 vs. T4 | *** | T0 vs. T4 | *** |  |
| T0 vs. T5 | ns | T0 vs. T5 | *** | T0 vs. T5 | *** |  |
| T1 vs. T2 | ns | T1 vs. T2 | ns | T1 vs. T2 | ns |  |
| T1 vs. T3 | ns | T1 vs. T3 | ns | T1 vs. T3 | ns |  |
| T1 vs. T4 | ns | T1 vs. T4 | *** | T1 vs. T4 | *** |  |
| T1 vs. T5 | ns | T1 vs. T5 | *** | T1 vs. T5 | *** |  |
| T2 vs. T3 | ns | T2 vs. T3 | ns | T2 vs. T3 | ns |  |
| T2 vs. T4 | ns | T2 vs. T4 | ** | T2 vs. T4 | *** |  |
| T2 vs. T5 | ns | T2 vs. T5 | *** | T2 vs. T5 | *** |  |
| T3 vs. T4 | ns | T3 vs. T4 | * | T3 vs. T4 | *** |  |
| T3 vs. T5 | ns | T3 vs. T5 | ** | T3 vs. T5 | *** |  |
| T4 vs. T5 | ns | T4 vs. T5 | ns | T4 vs. T5 | ns |  |
|  |  |  |  |  |  |  |
| **C 20:1 n9** |  |  |  |  |  |  |
| P | Statistical Significance | S | Statistical Significance | PL | Statistical Significance |  |
| T0 vs. T1 | ns | T0 vs. T1 | ns | T0 vs. T1 | ns |  |
| T0 vs. T2 | ns | T0 vs. T2 | ns | T0 vs. T2 | ns |  |
| T0 vs. T3 | *** | T0 vs. T3 | ns | T0 vs. T3 | *** |  |
| T0 vs. T4 | *** | T0 vs. T4 | ns | T0 vs. T4 | *** |  |
| T0 vs. T5 | *** | T0 vs. T5 | ns | T0 vs. T5 | *** |  |
| T1 vs. T2 | ns | T1 vs. T2 | ns | T1 vs. T2 | ns |  |
| T1 vs. T3 | *** | T1 vs. T3 | ns | T1 vs. T3 | *** |  |
| T1 vs. T4 | *** | T1 vs. T4 | ns | T1 vs. T4 | *** |  |
| T1 vs. T5 | *** | T1 vs. T5 | ns | T1 vs. T5 | *** |  |
| T2 vs. T3 | *** | T2 vs. T3 | ns | T2 vs. T3 | *** |  |
| T2 vs. T4 | *** | T2 vs. T4 | ns | T2 vs. T4 | *** |  |
| T2 vs. T5 | *** | T2 vs. T5 | ns | T2 vs. T5 | *** |  |
| T3 vs. T4 | ns | T3 vs. T4 | ns | T3 vs. T4 | ns |  |
| T3 vs. T5 | *** | T3 vs. T5 | ns | T3 vs. T5 | ** |  |
| T4 vs. T5 | ns | T4 vs. T5 | ns | T4 vs. T5 | ns |  |
|  |  |  |  |  |  |  |
| **C 18:3 n3** |  |  |  |  |  |  |
| P | Statistical Significance | S | Statistical Significance | PL | Statistical Significance |  |
| T0 vs. T1 | ns | T0 vs. T1 | *** | T0 vs. T1 | *** |  |
| T0 vs. T2 | ns | T0 vs. T2 | *** | T0 vs. T2 | *** |  |
| T0 vs. T3 | ns | T0 vs. T3 | *** | T0 vs. T3 | *** |  |
| T0 vs. T4 | ns | T0 vs. T4 | *** | T0 vs. T4 | *** |  |
| T0 vs. T5 | ns | T0 vs. T5 | *** | T0 vs. T5 | *** |  |
| T1 vs. T2 | ns | T1 vs. T2 | ns | T1 vs. T2 | ns |  |
| T1 vs. T3 | ns | T1 vs. T3 | ns | T1 vs. T3 | ns |  |
| T1 vs. T4 | ns | T1 vs. T4 | ns | T1 vs. T4 | ns |  |
| T1 vs. T5 | ns | T1 vs. T5 | *** | T1 vs. T5 | ** |  |
| T2 vs. T3 | ns | T2 vs. T3 | ns | T2 vs. T3 | ns |  |
| T2 vs. T4 | ns | T2 vs. T4 | ns | T2 vs. T4 | ns |  |
| T2 vs. T5 | ns | T2 vs. T5 | *** | T2 vs. T5 | * |  |
| T3 vs. T4 | ns | T3 vs. T4 | ns | T3 vs. T4 | ns |  |
| T3 vs. T5 | ns | T3 vs. T5 | *** | T3 vs. T5 | * |  |
| T4 vs. T5 | ns | T4 vs. T5 | * | T4 vs. T5 | ns |  |
|  |  |  |  |  |  |  |
| **C 20:2 n6** |  |  |  |  |  |  |
| P | Statistical Significance | S | Statistical Significance | PL | Statistical Significance |  |
| T0 vs. T1 | ** | T0 vs. T1 | *** | T0 vs. T1 | *** |  |
| T0 vs. T2 | ** | T0 vs. T2 | *** | T0 vs. T2 | *** |  |
| T0 vs. T3 | *** | T0 vs. T3 | *** | T0 vs. T3 | *** |  |
| T0 vs. T4 | *** | T0 vs. T4 | *** | T0 vs. T4 | *** |  |
| T0 vs. T5 | *** | T0 vs. T5 | *** | T0 vs. T5 | *** |  |
| T1 vs. T2 | ns | T1 vs. T2 | ns | T1 vs. T2 | ns |  |
| T1 vs. T3 | ns | T1 vs. T3 | ns | T1 vs. T3 | ns |  |
| T1 vs. T4 | ns | T1 vs. T4 | ns | T1 vs. T4 | *** |  |
| T1 vs. T5 | ns | T1 vs. T5 | ns | T1 vs. T5 | *** |  |
| T2 vs. T3 | ns | T2 vs. T3 | ns | T2 vs. T3 | ns |  |
| T2 vs. T4 | ns | T2 vs. T4 | ns | T2 vs. T4 | *** |  |
| T2 vs. T5 | ns | T2 vs. T5 | ns | T2 vs. T5 | *** |  |
| T3 vs. T4 | ns | T3 vs. T4 | ns | T3 vs. T4 | ** |  |
| T3 vs. T5 | ns | T3 vs. T5 | ns | T3 vs. T5 | *** |  |
| T4 vs. T5 | ns | T4 vs. T5 | ns | T4 vs. T5 | ns |  |
|  |  |  |  |  |  |  |
| **C 20:3 n6** |  |  |  |  |  |  |
| P | Statistical Significance | S | Statistical Significance | PL | Statistical Significance |  |
| T0 vs. T1 | ns | T0 vs. T1 | *** | T0 vs. T1 | *** |  |
| T0 vs. T2 | * | T0 vs. T2 | *** | T0 vs. T2 | *** |  |
| T0 vs. T3 | ** | T0 vs. T3 | *** | T0 vs. T3 | *** |  |
| T0 vs. T4 | *** | T0 vs. T4 | *** | T0 vs. T4 | *** |  |
| T0 vs. T5 | *** | T0 vs. T5 | *** | T0 vs. T5 | *** |  |
| T1 vs. T2 | ns | T1 vs. T2 | ns | T1 vs. T2 | ns |  |
| T1 vs. T3 | ns | T1 vs. T3 | ns | T1 vs. T3 | ns |  |
| T1 vs. T4 | * | T1 vs. T4 | ns | T1 vs. T4 | * |  |
| T1 vs. T5 | ** | T1 vs. T5 | ns | T1 vs. T5 | ** |  |
| T2 vs. T3 | ns | T2 vs. T3 | ns | T2 vs. T3 | ns |  |
| T2 vs. T4 | * | T2 vs. T4 | ns | T2 vs. T4 | * |  |
| T2 vs. T5 | * | T2 vs. T5 | ns | T2 vs. T5 | * |  |
| T3 vs. T4 | ns | T3 vs. T4 | ns | T3 vs. T4 | ns |  |
| T3 vs. T5 | ns | T3 vs. T5 | ns | T3 vs. T5 | * |  |
| T4 vs. T5 | ns | T4 vs. T5 | ns | T4 vs. T5 | ns |  |
|  |  |  |  |  |  |  |
| **C 20:4 n6** |  |  |  |  |  |  |
| P | Statistical Significance | S | Statistical Significance | PL | Statistical Significance |  |
| T0 vs. T1 | * | T0 vs. T1 | *** | T0 vs. T1 | *** |  |
| T0 vs. T2 | ** | T0 vs. T2 | *** | T0 vs. T2 | *** |  |
| T0 vs. T3 | ** | T0 vs. T3 | *** | T0 vs. T3 | *** |  |
| T0 vs. T4 | *** | T0 vs. T4 | *** | T0 vs. T4 | *** |  |
| T0 vs. T5 | *** | T0 vs. T5 | *** | T0 vs. T5 | *** |  |
| T1 vs. T2 | ns | T1 vs. T2 | ns | T1 vs. T2 | ns |  |
| T1 vs. T3 | ns | T1 vs. T3 | ns | T1 vs. T3 | ns |  |
| T1 vs. T4 | ns | T1 vs. T4 | ns | T1 vs. T4 | ns |  |
| T1 vs. T5 | ns | T1 vs. T5 | ns | T1 vs. T5 | ns |  |
| T2 vs. T3 | ns | T2 vs. T3 | ns | T2 vs. T3 | ns |  |
| T2 vs. T4 | ns | T2 vs. T4 | ns | T2 vs. T4 | ns |  |
| T2 vs. T5 | ns | T2 vs. T5 | ns | T2 vs. T5 | ns |  |
| T3 vs. T4 | ns | T3 vs. T4 | ns | T3 vs. T4 | ns |  |
| T3 vs. T5 | ns | T3 vs. T5 | ns | T3 vs. T5 | ns |  |
| T4 vs. T5 | ns | T4 vs. T5 | ns | T4 vs. T5 | ns |  |
|  |  |  |  |  |  |  |
| **C 24:0** |  |  |  |  |  |  |
| P | Statistical Significance | S | Statistical Significance | PL | Statistical Significance |  |
| T0 vs. T1 | *** | T0 vs. T1 | ns | T0 vs. T1 | ns |  |
| T0 vs. T2 | *** | T0 vs. T2 | ns | T0 vs. T2 | ns |  |
| T0 vs. T3 | *** | T0 vs. T3 | ns | T0 vs. T3 | ns |  |
| T0 vs. T4 | *** | T0 vs. T4 | ns | T0 vs. T4 | ns |  |
| T0 vs. T5 | *** | T0 vs. T5 | ns | T0 vs. T5 | ns |  |
| T1 vs. T2 | ** | T1 vs. T2 | ns | T1 vs. T2 | ns |  |
| T1 vs. T3 | *** | T1 vs. T3 | ns | T1 vs. T3 | ns |  |
| T1 vs. T4 | *** | T1 vs. T4 | ns | T1 vs. T4 | ns |  |
| T1 vs. T5 | *** | T1 vs. T5 | ns | T1 vs. T5 | ns |  |
| T2 vs. T3 | *** | T2 vs. T3 | ns | T2 vs. T3 | ns |  |
| T2 vs. T4 | *** | T2 vs. T4 | ns | T2 vs. T4 | ns |  |
| T2 vs. T5 | *** | T2 vs. T5 | ns | T2 vs. T5 | ns |  |
| T3 vs. T4 | *** | T3 vs. T4 | ns | T3 vs. T4 | ns |  |
| T3 vs. T5 | *** | T3 vs. T5 | ns | T3 vs. T5 | ns |  |
| T4 vs. T5 | ** | T4 vs. T5 | ns | T4 vs. T5 | ns |  |
|  |  |  |  |  |  |  |
| **C 20:5 n3** |  |  |  |  |  |  |
| P | Statistical Significance | S | Statistical Significance | PL | Statistical Significance |  |
| T0 vs. T1 | ns | T0 vs. T1 | ns | T0 vs. T1 | *** |  |
| T0 vs. T2 | ns | T0 vs. T2 | ns | T0 vs. T2 | *** |  |
| T0 vs. T3 | ns | T0 vs. T3 | ns | T0 vs. T3 | *** |  |
| T0 vs. T4 | ns | T0 vs. T4 | ns | T0 vs. T4 | *** |  |
| T0 vs. T5 | ns | T0 vs. T5 | * | T0 vs. T5 | *** |  |
| T1 vs. T2 | ns | T1 vs. T2 | ns | T1 vs. T2 | ns |  |
| T1 vs. T3 | ns | T1 vs. T3 | ns | T1 vs. T3 | ns |  |
| T1 vs. T4 | ns | T1 vs. T4 | ns | T1 vs. T4 | ns |  |
| T1 vs. T5 | ns | T1 vs. T5 | ns | T1 vs. T5 | * |  |
| T2 vs. T3 | ns | T2 vs. T3 | ns | T2 vs. T3 | ns |  |
| T2 vs. T4 | ns | T2 vs. T4 | ns | T2 vs. T4 | ns |  |
| T2 vs. T5 | ns | T2 vs. T5 | ns | T2 vs. T5 | ns |  |
| T3 vs. T4 | ns | T3 vs. T4 | ns | T3 vs. T4 | ns |  |
| T3 vs. T5 | ns | T3 vs. T5 | ns | T3 vs. T5 | ns |  |
| T4 vs. T5 | ns | T4 vs. T5 | ns | T4 vs. T5 | ns |  |
|  |  |  |  |  |  |  |
| **C 24:1 n9** |  |  |  |  |  |  |
| P | Statistical Significance | S | Statistical Significance | PL | Statistical Significance |  |
| T0 vs. T1 | ns | T0 vs. T1 | ns | T0 vs. T1 | ns |  |
| T0 vs. T2 | ns | T0 vs. T2 | ** | T0 vs. T2 | ns |  |
| T0 vs. T3 | ns | T0 vs. T3 | *** | T0 vs. T3 | ns |  |
| T0 vs. T4 | *** | T0 vs. T4 | *** | T0 vs. T4 | *** |  |
| T0 vs. T5 | *** | T0 vs. T5 | *** | T0 vs. T5 | *** |  |
| T1 vs. T2 | ns | T1 vs. T2 | ns | T1 vs. T2 | ns |  |
| T1 vs. T3 | ns | T1 vs. T3 | * | T1 vs. T3 | ns |  |
| T1 vs. T4 | *** | T1 vs. T4 | *** | T1 vs. T4 | * |  |
| T1 vs. T5 | *** | T1 vs. T5 | *** | T1 vs. T5 | *** |  |
| T2 vs. T3 | ns | T2 vs. T3 | ns | T2 vs. T3 | ns |  |
| T2 vs. T4 | * | T2 vs. T4 | * | T2 vs. T4 | * |  |
| T2 vs. T5 | ** | T2 vs. T5 | ** | T2 vs. T5 | *** |  |
| T3 vs. T4 | ns | T3 vs. T4 | ns | T3 vs. T4 | ns |  |
| T3 vs. T5 | ns | T3 vs. T5 | ns | T3 vs. T5 | *** |  |
| T4 vs. T5 | ns | T4 vs. T5 | ns | T4 vs. T5 | ns |  |
|  |  |  |  |  |  |  |
| **C 22:6 n3** |  |  |  |  |  |  |
| P | Statistical Significance | S | Statistical Significance | PL | Statistical Significance |  |
| T0 vs. T1 | ns | T0 vs. T1 | *** | T0 vs. T1 | ns |  |
| T0 vs. T2 | ns | T0 vs. T2 | *** | T0 vs. T2 | ns |  |
| T0 vs. T3 | ns | T0 vs. T3 | *** | T0 vs. T3 | ns |  |
| T0 vs. T4 | * | T0 vs. T4 | *** | T0 vs. T4 | ns |  |
| T0 vs. T5 | *** | T0 vs. T5 | *** | T0 vs. T5 | * |  |
| T1 vs. T2 | ns | T1 vs. T2 | ns | T1 vs. T2 | ns |  |
| T1 vs. T3 | ns | T1 vs. T3 | ns | T1 vs. T3 | ns |  |
| T1 vs. T4 | * | T1 vs. T4 | ns | T1 vs. T4 | ns |  |
| T1 vs. T5 | ** | T1 vs. T5 | ns | T1 vs. T5 | ns |  |
| T2 vs. T3 | ns | T2 vs. T3 | ns | T2 vs. T3 | ns |  |
| T2 vs. T4 | * | T2 vs. T4 | ns | T2 vs. T4 | ns |  |
| T2 vs. T5 | ** | T2 vs. T5 | ns | T2 vs. T5 | ns |  |
| T3 vs. T4 | ns | T3 vs. T4 | ns | T3 vs. T4 | ns |  |
| T3 vs. T5 | ns | T3 vs. T5 | ns | T3 vs. T5 | ns |  |
| T4 vs. T5 | ns | T4 vs. T5 | ns | T4 vs. T5 | ns |  |
|  |  |  |  |  |  |  |
| **SFA** |  |  |  |  |  |  |
| P | Statistical Significance | S | Statistical Significance | PL | Statistical Significance |  |
| T0 vs. T1 | * | T0 vs. T1 | *** | T0 vs. T1 | *** |  |
| T0 vs. T2 | *** | T0 vs. T2 | *** | T0 vs. T2 | *** |  |
| T0 vs. T3 | *** | T0 vs. T3 | *** | T0 vs. T3 | *** |  |
| T0 vs. T4 | *** | T0 vs. T4 | *** | T0 vs. T4 | *** |  |
| T0 vs. T5 | *** | T0 vs. T5 | *** | T0 vs. T5 | *** |  |
| T1 vs. T2 | ns | T1 vs. T2 | *** | T1 vs. T2 | ns |  |
| T1 vs. T3 | *** | T1 vs. T3 | *** | T1 vs. T3 | *** |  |
| T1 vs. T4 | *** | T1 vs. T4 | *** | T1 vs. T4 | *** |  |
| T1 vs. T5 | *** | T1 vs. T5 | *** | T1 vs. T5 | *** |  |
| T2 vs. T3 | *** | T2 vs. T3 | *** | T2 vs. T3 | *** |  |
| T2 vs. T4 | *** | T2 vs. T4 | *** | T2 vs. T4 | *** |  |
| T2 vs. T5 | *** | T2 vs. T5 | *** | T2 vs. T5 | *** |  |
| T3 vs. T4 | ** | T3 vs. T4 | *** | T3 vs. T4 | *** |  |
| T3 vs. T5 | *** | T3 vs. T5 | *** | T3 vs. T5 | *** |  |
| T4 vs. T5 | ns | T4 vs. T5 | ns | T4 vs. T5 | *** |  |
|  |  |  |  |  |  |  |
| **MUFA** |  |  |  |  |  |  |
| P | Statistical Significance | S | Statistical Significance | PL | Statistical Significance |  |
| T0 vs. T1 | *** | T0 vs. T1 | *** | T0 vs. T1 | *** |  |
| T0 vs. T2 | *** | T0 vs. T2 | *** | T0 vs. T2 | *** |  |
| T0 vs. T3 | *** | T0 vs. T3 | *** | T0 vs. T3 | *** |  |
| T0 vs. T4 | *** | T0 vs. T4 | *** | T0 vs. T4 | *** |  |
| T0 vs. T5 | *** | T0 vs. T5 | *** | T0 vs. T5 | *** |  |
| T1 vs. T2 | *** | T1 vs. T2 | *** | T1 vs. T2 | *** |  |
| T1 vs. T3 | *** | T1 vs. T3 | *** | T1 vs. T3 | *** |  |
| T1 vs. T4 | *** | T1 vs. T4 | *** | T1 vs. T4 | *** |  |
| T1 vs. T5 | *** | T1 vs. T5 | *** | T1 vs. T5 | *** |  |
| T2 vs. T3 | *** | T2 vs. T3 | *** | T2 vs. T3 | *** |  |
| T2 vs. T4 | *** | T2 vs. T4 | *** | T2 vs. T4 | *** |  |
| T2 vs. T5 | *** | T2 vs. T5 | *** | T2 vs. T5 | *** |  |
| T3 vs. T4 | *** | T3 vs. T4 | *** | T3 vs. T4 | *** |  |
| T3 vs. T5 | *** | T3 vs. T5 | *** | T3 vs. T5 | *** |  |
| T4 vs. T5 | *** | T4 vs. T5 | *** | T4 vs. T5 | *** |  |
|  |  |  |  |  |  |  |
| **PUFA** |  |  |  |  |  |  |
| P | Statistical Significance | S | Statistical Significance | PL | Statistical Significance |  |
| T0 vs. T1 | *** | T0 vs. T1 | *** | T0 vs. T1 | *** |  |
| T0 vs. T2 | *** | T0 vs. T2 | *** | T0 vs. T2 | *** |  |
| T0 vs. T3 | *** | T0 vs. T3 | *** | T0 vs. T3 | *** |  |
| T0 vs. T4 | *** | T0 vs. T4 | *** | T0 vs. T4 | *** |  |
| T0 vs. T5 | *** | T0 vs. T5 | *** | T0 vs. T5 | *** |  |
| T1 vs. T2 | ns | T1 vs. T2 | ns | T1 vs. T2 | *** |  |
| T1 vs. T3 | *** | T1 vs. T3 | *** | T1 vs. T3 | *** |  |
| T1 vs. T4 | *** | T1 vs. T4 | *** | T1 vs. T4 | *** |  |
| T1 vs. T5 | *** | T1 vs. T5 | *** | T1 vs. T5 | *** |  |
| T2 vs. T3 | *** | T2 vs. T3 | *** | T2 vs. T3 | *** |  |
| T2 vs. T4 | *** | T2 vs. T4 | *** | T2 vs. T4 | *** |  |
| T2 vs. T5 | *** | T2 vs. T5 | *** | T2 vs. T5 | *** |  |
| T3 vs. T4 | *** | T3 vs. T4 | *** | T3 vs. T4 | *** |  |
| T3 vs. T5 | *** | T3 vs. T5 | *** | T3 vs. T5 | *** |  |
| T4 vs. T5 | * | T4 vs. T5 | *** | T4 vs. T5 | *** |  |

Abbreviations: P, Primiparous; S, Secondiparous; PL, Pluriparous.

Statisical significance ***p<0.001; **p<0.01; *p<0.05
